# Supplementary material
Source: PubMed Central journal article supplement (PMC7793389)
Supplement: 10140_2020_1874_MOESM2_ESM.pdf [file 10140_2020_1874_MOESM2_ESM.pdf]

## Trauma and Emergency Radiology Online Elective

1. Is this your first radiology elective?

Yes

No

What other radiology elective(s) have you taken? Please indicate whether these elective(s) were in-person or online.

2. If you have previously taken an in-person radiology elective, which format do you prefer? [21]

Online

In-person

I would prefer a hybrid of both formats

Comments

3. Please rate your level of agreement with the following statements: [21]

|                                                                                                                                        | Strongly disagree     | Disagree              | Neutral               | Agree                 | Strongly Agree        |
|----------------------------------------------------------------------------------------------------------------------------------------|-----------------------|-----------------------|-----------------------|-----------------------|-----------------------|
| Prior to the cancellation of in-person rotations, I had planned to take a radiology elective in medical school.                        | <input type="radio"/> |
| Prior to this rotation, I felt confident in my ability to order appropriate imaging studies for common indications.                    | <input type="radio"/> |
| Upon the completion of this rotation, I feel more confident in my ability to order appropriate imaging studies for common indications. | <input type="radio"/> |
| Prior to this rotation, I felt confident in my ability to recognize critical imaging findings.                                         | <input type="radio"/> |
| Upon the completion of this rotation, I now feel more confident in my ability to recognize critical imaging findings.                  | <input type="radio"/> |
| This rotation is an excellent alternative to an in-person radiology elective.                                                          | <input type="radio"/> |
| I would have preferred an in-person radiology elective.                                                                                | <input type="radio"/> |
| On this rotation, I learned clinically relevant material that was presented in an accessible and engaging way.                         | <input type="radio"/> |

4. How would you rate the following educational resources?

|                                                | Poor                  | Below Average         | Average               | Above Average         | Excellent             |
|------------------------------------------------|-----------------------|-----------------------|-----------------------|-----------------------|-----------------------|
| A Practical Introduction to CT (YouTube video) | <input type="radio"/> |
| LearningRadiology video podcasts               | <input type="radio"/> |
| RWJMS SPACS Student Modules                    | <input type="radio"/> |
| UVA Radiology Modules                          | <input type="radio"/> |
| www.headneckbrainspine.com                     | <input type="radio"/> |
| UBC Radiology Online Modules                   | <input type="radio"/> |
| ICARUS Patient Simulation Cases                | <input type="radio"/> |
| UBC Radiology App                              | <input type="radio"/> |
| A Night in the ED App                          | <input type="radio"/> |
| Pacsbin Assessments                            | <input type="radio"/> |
| Weekly Zoom Sessions                           | <input type="radio"/> |
| Daily Resident Conferences                     | <input type="radio"/> |
| End-of-rotation presentation                   | <input type="radio"/> |

Comments

5. How much time did you spend per week completing the following:

|                                                                               | 0-1 hours             | 1-3 hours             | 3-5 hours             | 5-7 hours             | 7-10 hours            | 10+ hours             |
|-------------------------------------------------------------------------------|-----------------------|-----------------------|-----------------------|-----------------------|-----------------------|-----------------------|
| Online videos, podcasts, and unknown cases (excluding the weekly assessments) | <input type="radio"/> |
| Weekly assessments (excluding the weekly Zoom meetings)                       | <input type="radio"/> |
| Preparing your presentation                                                   | <input type="radio"/> |

Comments

6. The workload for this elective is:

- Too much
- Too little
- Just right

7. What aspects of the course did you like the most? How could this elective be improved?

8. How likely are you to recommend this elective to others?

- Very likely
- Likely
- Neither likely nor unlikely
- Unlikely
- Very unlikely

Comments

9. Additional suggestions/comments:
